# Supplementary material for: Spectral analysis approach for assessing the accuracy of low-cost air quality sensor network data
Source: Copernicus journal article supplement (doi:10.5194/amt-16-5415-2023), 2023-11-13
Supplement: Supplementary file 1 [file amt-16-5415-2023-supplement.pdf]

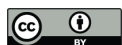

*Supplement of*

## **Spectral analysis approach for assessing the accuracy of low-cost air quality sensor network data**

**Vijay Kumar et al.**

*Correspondence to:* Suresh Dhaniyala (sdhaniya@clarkson.edu)

The copyright of individual parts of the supplement might differ from the article licence.

## S1 Performance metric equations

The metrics of RMSE (Root Mean Square Error) and MAE (Mean Absolute Error) are frequently utilized in model comparison due to their quantitative evaluation capabilities, error magnitude measurement, and ability to aid in model selection.

The RMSE and MAE are defined as follows;

$$RMSE = \sqrt{\frac{1}{N} \sum_{i=1}^N (x_i - R_i)^2} \quad (1)$$

$$MAE = \frac{1}{N} \sum_{i=1}^N |x_i - R_i| \quad (2)$$

where,

RMSE = root mean square error  $\mu g/m^3$

MAE = mean absolute error  $\mu g/m^3$

10 N = number of 1-hour periods during which all identical instruments are operating and returning valid averages over the duration

$x_i$  = valid 1-hour averaged PA sensor PM2.5 concentration for hour i  $\mu g/m^3$

$R_i$  = valid 1-hour averaged EPA PM2.5 concentration for hour i  $\mu g/m^3$

15 The locations of sampling sites and the EPA/PA reference numbers for the sites are listed in Table S1. In Table S2, the descriptive statistics related to Figure 3 is shown.

**Table S1.** Locations of sampling sites of PM<sub>2.5</sub>

| ID | Location                             | Name      | Latitude | Longitude |
|----|--------------------------------------|-----------|----------|-----------|
| E1 | 4500 W. 123rd St.                    | 170310001 | 41.67099 | -87.73246 |
| E2 | 7801 Lawndale                        | 170310076 | 41.75140 | -87.71349 |
| E3 | Kingery Expressway & Torrence Avenue | 170310119 | 41.57862 | -87.55741 |
| E4 | 9511 W. Harrison St                  | 170314007 | 42.06029 | -87.86322 |
| E5 | 13th St. & 50th Ave.                 | 170316005 | 41.86443 | -87.74890 |
| P1 | The Heart Of Riverside               | 10416     | 41.83212 | -87.81295 |
| P2 | Sasa_Pa2_SI_W                        | 8476      | 41.86120 | -87.62989 |
| P3 | Sheffield Neighbors                  | 12981     | 41.91974 | -87.65742 |
| P4 | Ukrainian Village                    | 3499      | 41.89270 | -87.68569 |
| P5 | Wheaton Highlands                    | 36395     | 41.86352 | -88.08800 |
| P6 | West Lawn                            | 39173     | 41.76776 | -87.73013 |
| P7 | West Rogers Park                     | 4395      | 41.99600 | -87.69200 |
| P8 | Mulford Manor                        | 4404      | 42.02362 | -87.76341 |
| P9 | 1138 Plymouth                        | 5588      | 41.86889 | -87.62944 |

## S2 Baseline removal

To create the average PSD curve, we obtained the PSD curves for each of the 5 EPA sites and the 9 PA sites. To remove the baseline of the PSD curve, we first smoothed the PSD data with a moving average filter and then subtracted the smoothed PSD curve from the original PSD curve. For the moving average smoothing, we used a window size of 100 hours.

**Table S2.** Descriptive Statistics of PM<sub>2.5</sub> measurements from EPA and PA sampling locations

| ID     | E1   | E2   | E3   | E4  | E5   | P1   | P2   | P3   | P4   | P5   | P6   | P7   | P8   | P9   |
|--------|------|------|------|-----|------|------|------|------|------|------|------|------|------|------|
| Q1     | 5.3  | 5.1  | 6.3  | 4.5 | 4.5  | 4.5  | 5.8  | 4.8  | 4.2  | 5.5  | 5.6  | 3.9  | 4.4  | 4.5  |
| Median | 7.9  | 8.3  | 9.9  | 8.5 | 7.7  | 9.8  | 11.6 | 10.7 | 8.8  | 11.1 | 11.1 | 8.5  | 9.7  | 9.6  |
| Mean   | 8.8  | 9.1  | 11.0 | 9.7 | 8.8  | 12.6 | 14.3 | 13.5 | 12.0 | 14.1 | 14.6 | 11.0 | 12.2 | 12.4 |
| Q3     | 11.2 | 12.2 | 14.6 | 3.4 | 11.8 | 17.8 | 20.6 | 19.3 | 16.9 | 20.1 | 21.1 | 15.6 | 17.3 | 17.5 |

**Table S3.** Local correction model performance

| Location | Model            | $R^2$ | RMSE | MAE | Time   |
|----------|------------------|-------|------|-----|--------|
| US       | St correction    | 0.84  | 2.5  | 1.7 | daily  |
| Chicago  | Local correction | 0.86  | 1.5  | 0.3 | daily  |
| Chicago  | Local correction | 0.73  | 2.6  | 1.9 | hourly |

In Table S3, the performance of the standard US-wide correction model in comparison to a local correction model for the prediction of PA data is shown. Two local correction models were built - one based on daily data and the other on hourly data. The standard correction model was built on daily data and was used accordingly in this study.
